# Supplementary material for: 16.55% efficiency ternary organic solar cells enabled by incorporating a small molecular donor
Source: Royal Society of Chemistry journal article supplement (doi:10.1039/c9ta10145d), 2019-01-01
Supplement: c9ta10145d1.pdf [file c9ta10145d1.pdf]

## **16.55% Efficiency Ternary Organic Solar Cells Enabled by Incorporating a Small Molecular Donor**

*Tingting Yan, Jinfeng Ge, Tao Lei, Wenxia Zhang, Wei Song, Billy Fanady, Danli Zhang, Sanhui Chen, Ruixiang Peng\*, and Ziyi Ge\**

T. T. Yan, J. F. Ge, T. Lei, W. X. Zhang, W. Song, B. Fanady, D. L. Zhang, S. H. Chen, R. X. Peng, Prof. Z. Y. Ge

Ningbo Institute of Materials Technology and Engineering

Chinese Academy of Sciences

Ningbo 315201, P. R. China

E-mail: pengrx@nimte.ac.cn, geziyi@nimte.ac.cn

T. T. Yan, T. Lei, W. X. Zhang, W. Song, Prof. Z. Y. Ge

Center of Materials Science and Optoelectronics Engineering

University of Chinese Academy of Sciences

Beijing 100049, P. R. China

## Experimental Section

**Materials.** PM6, Y6, SM1, PDINO were purchased from Solarmer Materials Inc., PEDOT:PSS (Clevios P VP 4083) was obtained from J&K Chemicals Inc. 1-chloronaphthalene (CN), Chloroform (CF) and other drying solvent were bought from Aldrich Inc. The indium-doped tin oxide (ITO)-coated glass (1.1 mm thick,  $\leq 15 \Omega/\text{square}$ ) were purchased from Wuhu Token Sciences Co., Ltd. PET flexible substrates were purchased from South China Xiangcheng Technology Co., Ltd.

**Characterizations.** The UV-vis absorption spectrums test was done in the Spectrophotometer (Perkin-Elmer Lambda 950). Photoluminescence spectroscopy was accomplished on a fluorescence spectrometer (FL3-111, Horiba). The current-voltage ( $J-V$ ) under AM 1.5 G irradiation and electrical conductivity test in the dark were done in the Keithley 2440 source meter with a solar simulator (Newport-Oriel® Sol3A 450W) device and calibrated by a standard Si solar cell. The external quantum efficiency (EQE) spectrums were conducted by the solar cell QE tester (QE-R, Enli Technology Co., Ltd) which was calibrated with a 75W xenon lamp source standard probe. Veeco Dimension 3100V atomic force microscope was used to do the surface morphology and phase diagram test. XEUSS SAXS/WAXS equipment were employed to complete the grazing-incidence wide-angle X-ray scattering (GIWAXS) analyses.

### 1. Cyclic voltammetry (CV) test

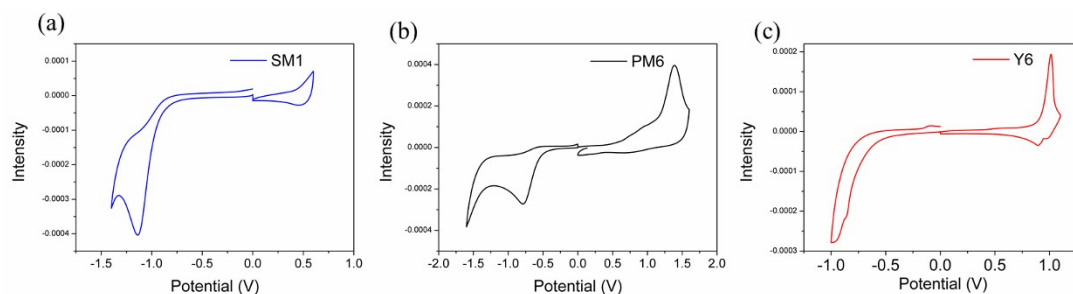

**Figure S1.** CV test results of (a) SM1 (b) PM6 and (c) Y6, respectively.

Cyclic voltammetry (CV) was used to calculate the energy levels of SM1, PM6 and Y6, Ag/AgCl was used as the reference electrode in anhydrous  $\text{CH}_3\text{CN}$  solution and ferrocene/ferrocenium ( $\text{F}_c/\text{F}_c^+$ ) was used as internal reference. The following equations were employed to calculate the HOMO and LUMO:

$$\text{HOMO} = - [E_{\text{OX}} + (4.8 - E_{\text{FC}})] \text{ eV}$$

$$\text{LUMO} = - [E_{\text{red}} + (4.8 - E_{\text{FC}})] \text{ eV}$$

Where  $E_{\text{OX}}$  is the onset of oxidation and the  $E_{\text{red}}$  relates to the reduction potential, respectively. SM1 exhibits the HOMO and LUMO levels of PM6 are calculated to be -5.25 and -3.33 eV, PM6 exhibits the HOMO and LUMO levels of PM6 are calculated to be -5.50 eV and -3.56 eV, The HOMO and LUMO levels of Y6 are -5.70 and -4.10 eV, respectively.

## 2. $J$ - $V$ and EQE results of optimized ternary devices

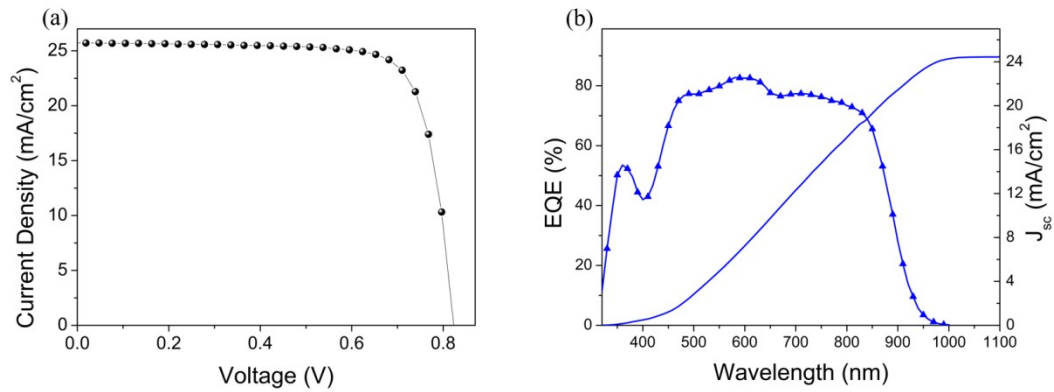

**Figure S2.** (a)  $J$ - $V$  curves and (b) EQE spectrum based on PM6:SM1:Y6 ternary devices containing 15 wt% SM1 in donors.

## 3. Histograms of PCEs

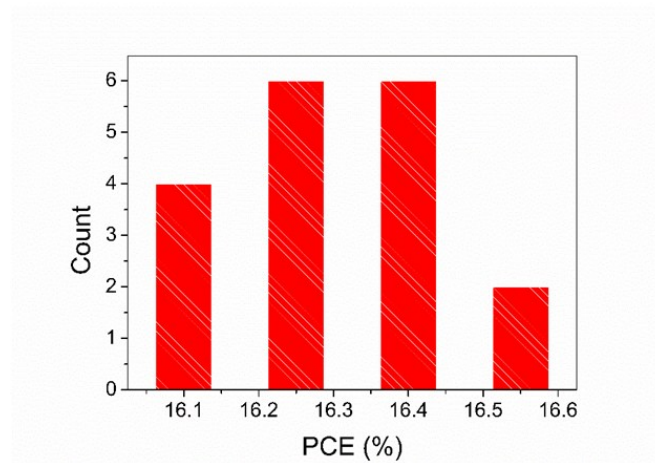

**Figure S3.** Histograms of PCEs counts for 18 individual devices based on optimal ternary OSCs.

## 4. Stability of the devices

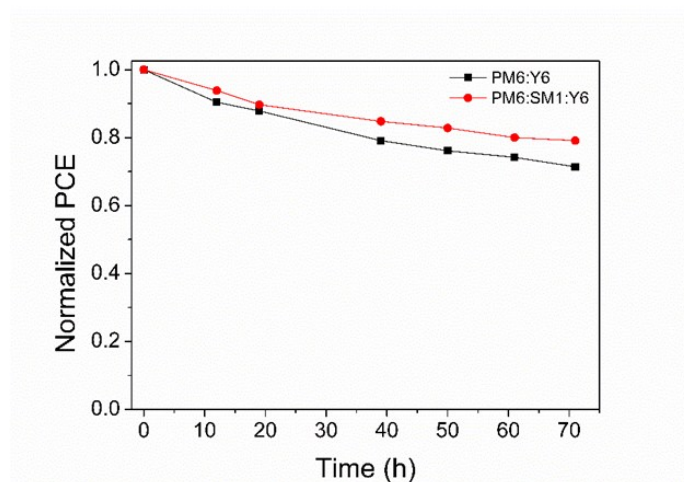

**Figure S4.** Stability of PM6:Y6 and PM6:SM1:Y6 with 15% SM1 devices tested in the glovebox without encapsulation.

The stability of PM6:Y6 binary and PM6:SM1:Y6 ternary OSCs within 70 h were tested and shown in **Figure S4**. The devices were kept in the glovebox filled with nitrogen and without illumination. The  $V_{oc}$  almost kept identical while the FF and  $J_{sc}$  decreased to a certain extent in both binary and ternary devices. The PCE in PM6:Y6 binary systems dropped to around 75% of the original value while in PM6:SM1:Y6 ternary systems the PCE still remained over 80% of the original value, indicating that adding the third component small molecular donor may be beneficial for the stability of PM6:Y6 based systems.

## 5. Hole and electron mobility

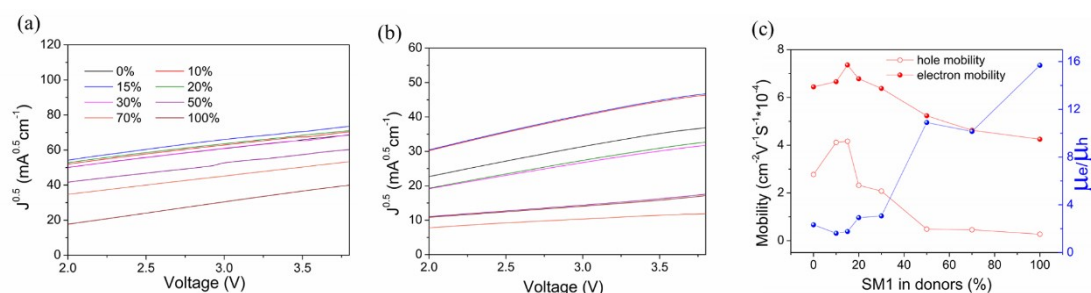

**Figure S5.** The  $J_{0.5}$ - $V$  curves of the PM6:SM1:Y6 based ternary devices by adding different ratio of. (a) electron-only devices in a structure of ITO/Al/active layer/PDINO/Al. (b) hole-only devices in a structure of ITO/PEDOT:PSS/active layer/MoO<sub>3</sub>/Al. (c) electron mobility ( $\mu_e$ ), hole mobility ( $\mu_h$ ) and  $\mu_e/\mu_h$  in ternary blend with different ratio of two donors and acceptor.

The space charge limited current (*SCLC*) method were employed to investigated the carriers mobility of binary and ternary organic solar cells, the structure of the hole-only and electron-only devices were ITO/PEDOT:PSS/active layer/MoO<sub>3</sub>/Al and ITO/Al/active layer/PDINO/Al, respectively.

The carrier mobilities (as shown in **Figure S5**) were calculated by fitting the Mott-Gurney square law:

$$J_{SCLC} = \frac{9}{8} \epsilon_0 \epsilon_r \mu_e \frac{V^2}{L^3}$$

**Figure S5a-b** shows the  $J_{0.5}$ - $V$  curves of binary and ternary devices. As shown in **Figure 5c**, the hole and eletron mobilities shows relatively low hole mobility ( $\mu_h$ ) ( $2.77 \times 10^{-4} \text{ cm}^2 \text{ V}^{-1} \text{ s}^{-1}$ ) and electron mobility ( $\mu_e$ ) ( $6.44 \times 10^{-4} \text{ cm}^2 \text{ V}^{-1} \text{ s}^{-1}$ ) in the PM6:Y6 binary, the hole and electron mobilities increased as SM1 was added. After the content of SM1 was above 15%, the mobilities started to decrease and the SM1:Y6 binary systems showed the lowest hole and electron mobilites. The ratios of  $\mu_e/\mu_h$  which refer to the balance of the charge transport and showed lowest value of 1.61 as the content of SM1 was around 15 wt% indicated that the charge transport of hole and eletron were well balanced thus leading to the increase of  $J_{sc}$  and FF.

## 6. Absorption and PL spectrum of SM1 film

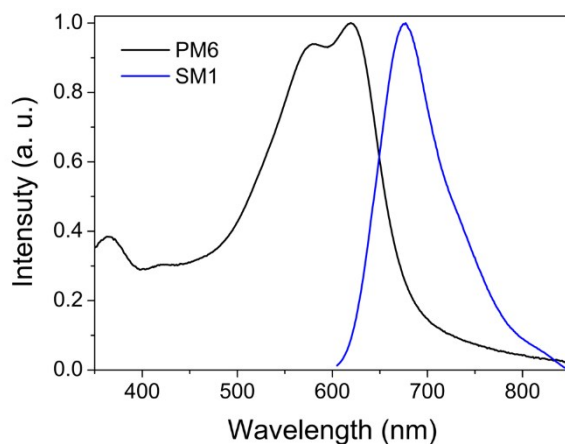

**Figure S6.** The absorption spectrum of PM6 film and PL spectrum of SM1 film.

## 7. GIWAXS characterization

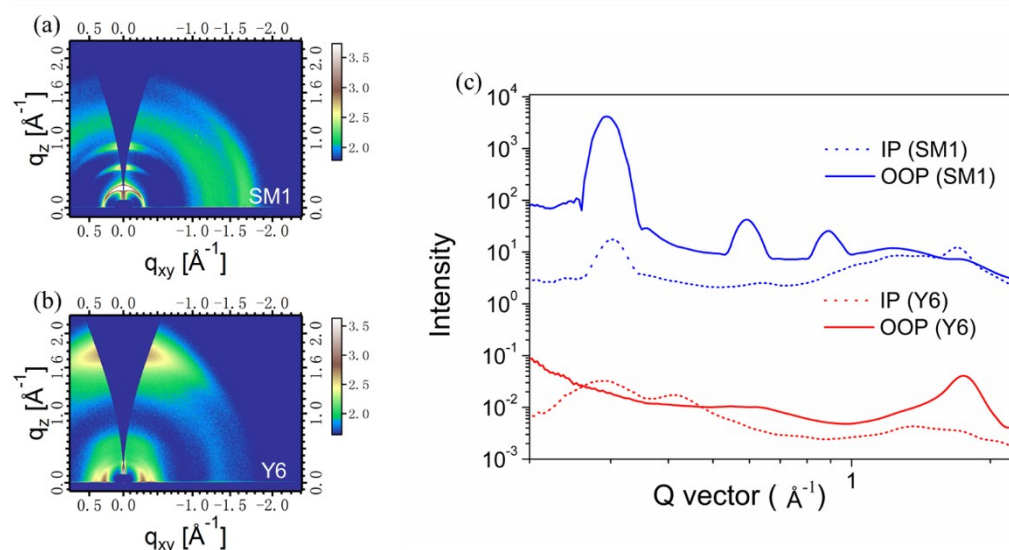

**Figure S7.** GIWAXS images of (a) SM1 and (b) Y6 neat films, (c) GIWAXS intensity profiles along the in-plane (dotted line) and out-of-plane (solid line) directions for the neat films of PM6 and Y6.

The GIWAXS images of SM1 and Y6 neat films are shown in **Figure S7a-b**, and the GIWAXS intensity profiles along the in-plane (dotted line) and out-of-plane (solid line) directions for the neat films of SM1 and Y6 are shown in **Figure S7c**. GIWAXS images and intensity profiles of Y6 were obtained from our previous work (Advanced Materials, 2019, 31, 1902210). There exist (100) peaks along  $q_z$  in  $0.294 \text{ \AA}^{-1}$  in the lamellar diffractions and  $\pi$ - $\pi$  stacking diffractions along  $q_{xy}$  in  $1.718 \text{ \AA}^{-1}$  indicating that the SM1 had a preference of edge-on orientation. In addition, Y6 exhibited a strong peak in  $0.299 \text{ \AA}^{-1}$  along the in-plane direction and  $1.76 \text{ \AA}^{-1}$  along the out-of-plane direction, which tends to form face-on orientation.

## 8. AFM characterization of blend films

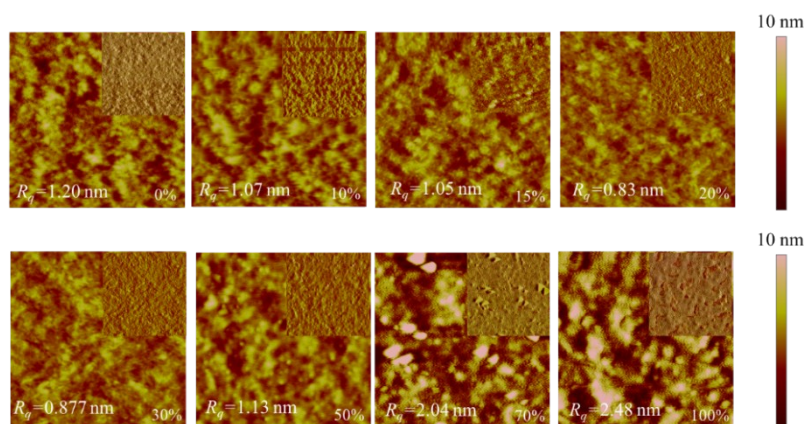

**Figure S8.** AFM images ( $2 \times 2 \mu\text{m}$ ) of PM6:SM1:Y6 based systems with different blending contents of SM1.
